# Supplementary material for: Early adaptive schemas, emotional regulation, and cognitive flexibility in eating disorders: subtype specific predictors of eating disorder symptoms using hierarchical linear regression
Source: PubMed Central journal article supplement (PMC11362190; doi:10.1007/s40519-024-01682-4), 2024-08-29
Supplement: 40519_2024_1682_MOESM2_ESM.pdf [file 40519_2024_1682_MOESM2_ESM.pdf]

# Early adaptive schemas, emotional regulation, and cognitive flexibility in eating disorders: sub-type specific predictors of eating disorder symptoms using hierarchical linear regression

## Introduction

Here we detail the manuscripts analysis of the Anorexia Nervosa sample using the Hierarchical Linear Regression (HLR: version v0.2.2) package. We cover the:

- Analysis process
- Outputs (assumption checks and model statistics)
- Validation of outputs against the equivalent analysis performed in SPSS.

## Setup

Import the necessary packages, set directory, and load data file.

- Check HLR dependencies at <https://github.com/teanijarv/HLR>

```
import os
import statsmodels as sm
import pandas as pd
import numpy as np
from HLR import HierarchicalLinearRegression

# Set working directory as required
os.chdir('c:\\')

# Load datasets
data = pd.read_csv('AnorexiaDataset_Final.csv')
```

## Setup

```
# Define the models for hierarchical regression including predictors for each model
X = {1: ['Age', 'Sex', 'BMI'],
      2: ['Age', 'Sex', 'BMI', 'EmReg_CR', 'EmReg_ES', 'CFI_Alt', 'CFI_Ctr1'],
      3: ['Age', 'Sex', 'BMI', 'EmReg_CR', 'EmReg_ES', 'CFI_Alt', 'CFI_Ctr1', 'YPSQ_EFSA',
          'YPSQ_S', 'YPSQ_EC', 'YPSQ_O', 'YPSQ_EOS', 'YPSQ_SCRE', 'YPSQ_DS', 'YPSQ_SB', 'YPSQ_HSC']}

# Define the outcome variable
y = 'EDE_Q_G'

# Initiate the HLR object (missing_data and ols_params are optional parameters)
hreg = HierarchicalLinearRegression(data, X, y)
```

## Output Summary

Generate a summarised report of HLR and output (if desired)

```
hreg.summary()
summary = hreg.summary()
summary.to_csv('model_summary.csv')
```

| Model Level | Predictors                                        | N (observations) | DF (residuals) | DF (model) | R-squared | F-value  | P-value (F)  | SSR        | SSTO       | ... | MSE (total) | Beta coeffs                                  |
|-------------|---------------------------------------------------|------------------|----------------|------------|-----------|----------|--------------|------------|------------|-----|-------------|----------------------------------------------|
| 1           | [Age, Sex, BMI]                                   | 155.0            | 151.0          | 3.0        | 0.056637  | 3.021874 | 3.159795e-02 | 200.285981 | 212.310597 | ... | 1.37864     | {'const': 5.28540529816E<br>'Age': 0.0114500 |
| 2           | [Age, Sex, BMI, EmReg_CR, EmReg_ES, CFI_Alt, C... | 155.0            | 147.0          | 7.0        | 0.155811  | 3.875933 | 6.674191e-04 | 179.230364 | 212.310597 | ... | 1.37864     | {'const': 4.974346612655<br>'Age': 0.0208135 |

| Model Level | Predictors                                        | N (observations) | DF (residuals) | DF (model) | R-squared | F-value  | P-value (F)  | SSR        | SSTO       | ... | MSE (total) | Beta coeffs                               |
|-------------|---------------------------------------------------|------------------|----------------|------------|-----------|----------|--------------|------------|------------|-----|-------------|-------------------------------------------|
| 3           | [Age, Sex, BMI, EmReg_CR, EmReg_ES, CFI_Alt, C... | 155.0            | 138.0          | 16.0       | 0.375967  | 5.196387 | 2.048347e-08 | 132.488790 | 212.310597 | ... | 1.37864     | {'const': 4.412113500863 'Age': 0.0212693 |

### Assumption Checks

Run diagnostics on all the models. Convert dictionary output to dataframe and output

```
diagnostics = hreg.diagnostics(verbose=True)
diagnostics = pd.DataFrame.from_dict(diagnostics)
diagnostics.to_csv('model_diagnostics.csv')
```

| Test                                      | Result | Statistic              | p-value                | Passed |
|-------------------------------------------|--------|------------------------|------------------------|--------|
| Independence of Residuals (Durbin-Watson) | False  | 1.1884652006141259     | -                      | No     |
| Linearity (Pearson r)                     |        |                        |                        |        |
| - Age                                     | False  | 0.07116642137977928    | 0.3788813749802866     | No     |
| - Sex                                     | False  | 0.044998147255722064   | 0.5782317894531495     | No     |
| - BMI                                     | True   | -0.22216787322709358   | 0.005462924797018646   | Yes    |
| - EmReg_CR                                | True   | -0.21084450482551603   | 0.008453050971642742   | Yes    |
| - EmReg_ES                                | False  | 0.1519284443242815     | 0.059139738484216386   | No     |
| - CFI_Alt                                 | False  | -0.04604377724197489   | 0.5694225757304743     | No     |
| - CFI_Ctrl                                | True   | -0.2804165610693205    | 0.00040920428876663493 | Yes    |
| - YPSQ_EFSA                               | True   | -0.34527010801913754   | 1.0832045204506238e-05 | Yes    |
| - YPSQ_S                                  | True   | -0.26235550388827794   | 0.000974376710118128   | Yes    |
| - YPSQ_EC                                 | False  | 0.03234087875332901    | 0.689535128316351      | No     |
| - YPSQ_O                                  | True   | -0.4203043607770755    | 5.189116219910229e-08  | Yes    |
| - YPSQ_EOS                                | False  | -0.13122824398530147   | 0.10360969550479024    | No     |
| - YPSQ_SCRE                               | True   | -0.5164286115339844    | 6.061744997756237e-12  | Yes    |
| - YPSQ_DS                                 | True   | -0.1612898480338923    | 0.04497001142293863    | Yes    |
| - YPSQ_SB                                 | True   | -0.29695298580374724   | 0.0001753558098194336  | Yes    |
| - YPSQ_HSC                                | False  | -0.03817329213893438   | 0.6372275950047485     | No     |
| Linearity (Rainbow Test)                  | False  | 2.7297286583564198     | 3.9498634690229417e-05 | No     |
| Homoscedasticity (Breusch-Pagan Test)     | True   | 16.78137858185311      | 0.39987855337467015    | Yes    |
| Homoscedasticity (Goldfeld-Quandt Test)   | True   | 0.4497303098697752     | 0.9988608971662183     | Yes    |
| Multicollinearity (Pairwise Correlations) | True   |                        |                        | Yes    |
| Multicollinearity (VIFs)                  | True   |                        |                        | Yes    |
| Outliers (Extreme Standardized Residuals) | True   |                        |                        | Yes    |
| Outliers (High Cook's Distance)           | True   |                        |                        | Yes    |
| Normality (Mean of Residuals)             | True   | 1.5815306054015132e-14 | -                      | Yes    |
| Normality (Shapiro-Wilk Test)             | False  | 0.9612044095993042     | 0.00024456685059703887 | No     |

### Plots

Generate plots to verify model assumptions.

```
hreg.plot_studentized_residuals_vs_fitted()
hreg.plot_qq_residuals()
hreg.plot_influence()
hreg.plot_std_residuals()
hreg.plot_histogram_std_residuals()
```

```
hreg.plot_partial_regression()
```

Here we show the model 3 studentized\_residuals\_vs\_fitted plot.

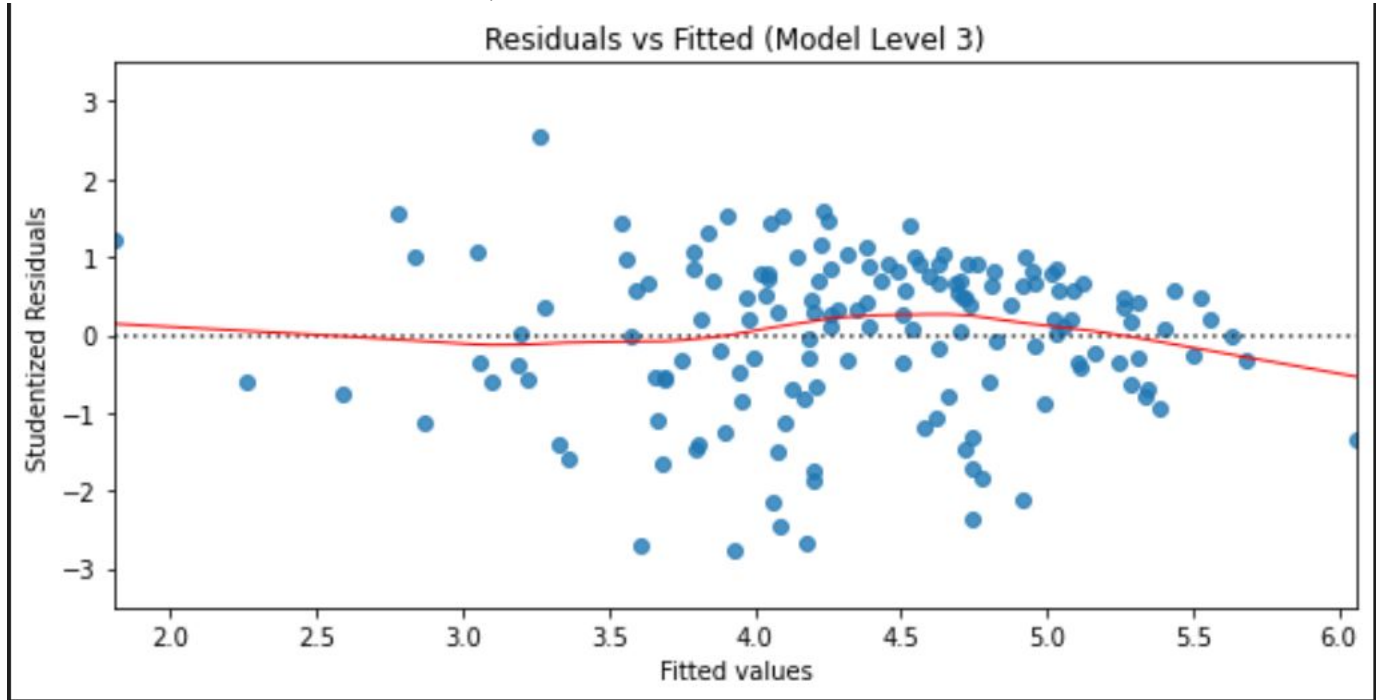

**SPSS Validation**

The above HLR results are compared to equivalent analyses conducted with SPSS (v29.0).

Model summary results (including Durbin-Watson).

**SPSS**

**Model Summary<sup>d</sup>**

| Model | R                 | R Square | Adjusted R Square | Std. Error of the Estimate | Change Statistics |          | Durbin-Watson |
|-------|-------------------|----------|-------------------|----------------------------|-------------------|----------|---------------|
|       |                   |          |                   |                            | R Square Change   | F Change |               |
| 1     | .238 <sup>a</sup> | .057     | .038              | 1.15169                    | .057              | 3.022    |               |
| 2     | .395 <sup>b</sup> | .156     | .116              | 1.10420                    | .099              | 4.317    |               |
| 3     | .613 <sup>c</sup> | .376     | .304              | .97983                     | .220              | 5.410    | 1.188         |

**HLR**

| Model Level | R-squared | R-squared change | F-value change | P-value (F-value change) |
|-------------|-----------|------------------|----------------|--------------------------|
| 0           | 0.056637  | NaN              | NaN            | NaN                      |
| 1           | 0.155811  | 0.099174         | 4.317315       | 0.002485                 |
| 2           | 0.375967  | 0.220157         | 5.409545       | 0.000002                 |

| Test                                      | Result | Statistic          | p-value | Passed |
|-------------------------------------------|--------|--------------------|---------|--------|
| Independence of Residuals (Durbin-Watson) | False  | 1.1884652006141259 | -       | No     |

ANOVA results

**SPSS**

**ANOVA<sup>a</sup>**

| Model |            | Sum of Squares | df  | Mean Square | F     | Sig.               |
|-------|------------|----------------|-----|-------------|-------|--------------------|
| 1     | Regression | 12.025         | 3   | 4.008       | 3.022 | .032 <sup>b</sup>  |
|       | Residual   | 200.286        | 151 | 1.326       |       |                    |
|       | Total      | 212.311        | 154 |             |       |                    |
| 2     | Regression | 33.080         | 7   | 4.726       | 3.876 | <.001 <sup>c</sup> |
|       | Residual   | 179.230        | 147 | 1.219       |       |                    |
|       | Total      | 212.311        | 154 |             |       |                    |
| 3     | Regression | 79.822         | 16  | 4.989       | 5.196 | <.001 <sup>d</sup> |
|       | Residual   | 132.489        | 138 | .960        |       |                    |
|       | Total      | 212.311        | 154 |             |       |                    |

**HLR**

| Model Level | N (observations) | DF (residuals) | DF (model) | R-squared | F-value  | P-value (F)  | SSR        | SSTO       | MSE (model) | MSE (residuals) | MSE (total) |
|-------------|------------------|----------------|------------|-----------|----------|--------------|------------|------------|-------------|-----------------|-------------|
| 0           | 1                | 155.0          | 151.0      | 3.0       | 0.056637 | 3.021874e-02 | 200.285981 | 212.310597 | 4.008205    | 1.326397        | 1.37864     |
| 1           | 2                | 155.0          | 147.0      | 7.0       | 0.155811 | 6.674191e-04 | 179.230364 | 212.310597 | 4.725748    | 1.219254        | 1.37864     |
| 2           | 3                | 155.0          | 138.0      | 16.0      | 0.375967 | 2.048347e-08 | 132.488790 | 212.310597 | 4.988863    | 0.960064        | 1.37864     |

| Predictor | VIF     |
|-----------|---------|
| Age       | 1.14286 |
| Sex       | 1.11053 |
| BMI       | 1.20749 |
| EmReg_CR  | 1.67596 |
| EmReg_ES  | 2.05902 |
| CFI_Alt   | 1.59785 |
| CFI_Ctrl  | 1.76409 |
| YPSQ_EFSA | 2.43041 |
| YPSQ_S    | 1.76715 |
| YPSQ_EC   | 1.37120 |
| YPSQ_O    | 1.85001 |
| YPSQ_EOS  | 2.31678 |
| YPSQ_SCRE | 1.93756 |
| YPSQ_DS   | 1.28125 |
| YPSQ_SB   | 2.06255 |
| YPSQ_HSC  | 1.83167 |

Beta coefficients, significance, and partial and semi-partial (part) correlation, and VIF results.

**SPSS**

| Model | Coefficients <sup>a</sup>   |            |                           |       |        |       |              |         |       |                         |       |
|-------|-----------------------------|------------|---------------------------|-------|--------|-------|--------------|---------|-------|-------------------------|-------|
|       | Unstandardized Coefficients |            | Standardized Coefficients |       | t      | Sig.  | Correlations |         |       | Collinearity Statistics |       |
|       | B                           | Std. Error | Beta                      |       |        |       | Zero-order   | Partial | Part  | Tolerance               | VIF   |
| 3     | (Constant)                  | 4.412      | 1.207                     |       | 3.656  | <.001 |              |         |       |                         |       |
|       | Age                         | .021       | .012                      | .128  | 1.780  | .077  | .071         | .150    | .120  | .875                    | 1.143 |
|       | Sex                         | .424       | .399                      | .075  | 1.062  | .290  | .045         | .090    | .071  | .900                    | 1.111 |
|       | BMI                         | -.042      | .032                      | -.097 | -1.316 | .190  | -.222        | -.111   | -.088 | .828                    | 1.207 |
|       | EmReg_CR                    | -.055      | .088                      | -.054 | -.621  | .536  | -.211        | -.053   | -.042 | .597                    | 1.676 |
|       | EmReg_ES                    | .104       | .087                      | .116  | 1.203  | .231  | .152         | .102    | .081  | .486                    | 2.059 |
|       | CFI_Alt                     | .008       | .008                      | .076  | .890   | .375  | -.046        | .076    | .060  | .626                    | 1.598 |
|       | CFI_Ctrl                    | -.004      | .013                      | -.029 | -.325  | .745  | -.280        | -.028   | -.022 | .567                    | 1.764 |
|       | YPSQ_EFS A                  | -.022      | .094                      | -.025 | -.237  | .813  | -.345        | -.020   | -.016 | .411                    | 2.430 |
|       | YPSQ S                      | -.143      | .088                      | -.144 | -1.616 | .108  | -.262        | -.136   | -.109 | .566                    | 1.767 |
|       | YPSQ_EC                     | .030       | .094                      | .025  | .320   | .749  | .032         | .027    | .022  | .729                    | 1.371 |
|       | YPSQ_O                      | -.158      | .095                      | -.151 | -1.656 | .100  | -.420        | -.140   | -.111 | .541                    | 1.850 |
|       | YPSQ_EOS                    | .196       | .101                      | .199  | 1.947  | .054  | -.131        | .163    | .131  | .432                    | 2.317 |
|       | YPSQ_SCR E                  | -.469      | .123                      | -.356 | -3.804 | <.001 | -.516        | -.308   | -.256 | .516                    | 1.938 |
|       | YPSQ_DS                     | -.058      | .064                      | -.070 | -.916  | .361  | -.161        | -.078   | -.062 | .780                    | 1.281 |
|       | YPSQ_SB                     | -.112      | .095                      | -.114 | -1.182 | .239  | -.297        | -.100   | -.080 | .485                    | 2.063 |
|       | YPSQ_HSC                    | .131       | .080                      | .149  | 1.639  | .103  | -.038        | .138    | .110  | .546                    | 1.832 |

HLR (Note: Output formatted to allow for ease of comparison)

|              | Beta <u>coefs</u> | Std Beta <u>coefs</u> | P-values (beta <u>coefs</u> ) | Partial correlations | Semi-partial (part) correlations |
|--------------|-------------------|-----------------------|-------------------------------|----------------------|----------------------------------|
| Constant     | 4.412114          |                       | 0.000363                      |                      |                                  |
| 'Age'        | 0.021269          | 0.127973              | 0.077252                      | 0.149826             | 0.119707                         |
| 'Sex'        | 0.424315          | 0.075286              | 0.289912                      | 0.09007              | 0.071442                         |
| 'BMI'        | -0.04237          | -0.09723              | 0.190423                      | -0.11131             | -0.08848                         |
| 'EmReg_CR'   | -0.05474          | -0.05402              | 0.535923                      | -0.05275             | -0.04173                         |
| 'EmReg_ES'   | 0.104368          | 0.116073              | 0.231067                      | 0.101867             | 0.080891                         |
| 'CFI_Alt'    | 0.007554          | 0.075682              | 0.37483                       | 0.075575             | 0.059872                         |
| 'CFI_Ctrl'   | -0.00407          | -0.02906              | 0.745369                      | -0.02769             | -0.02188                         |
| 'YPSQ_EFSA'  | -0.02224          | -0.02488              | 0.812764                      | -0.0202              | -0.01596                         |
| 'YPSQ_S'     | -0.14268          | -0.14442              | 0.10846                       | -0.13625             | -0.10864                         |
| 'YPSQ_EC'    | 0.030073          | 0.025203              | 0.749401                      | 0.027236             | 0.021523                         |
| 'YPSQ_O'     | -0.15803          | -0.15148              | 0.09995                       | -0.13961             | -0.11137                         |
| 'YPSQ_EOS'   | 0.196106          | 0.19927               | 0.053582                      | 0.163498             | 0.130918                         |
| 'YPSQ_SCR E' | -0.46869          | -0.3561               | 0.000213                      | -0.30809             | -0.25583                         |
| 'YPSQ_DS'    | -0.05848          | -0.06976              | 0.361025                      | -0.07778             | -0.06163                         |
| 'YPSQ_SB'    | -0.11196          | -0.11419              | 0.239075                      | -0.10015             | -0.07951                         |
| 'YPSQ_HSC'   | 0.13052           | 0.14921               | 0.10339                       | 0.13822              | 0.11025                          |

### Using HLR

HLR is a simple Python package for running hierarchical linear regression.

It is built to work with Pandas dataframes, uses SciPy, statsmodels, and pingouin under the hood, and runs diagnostic tests for testing assumptions while plotting figures with matplotlib and seaborn.

Check out and contribute to the code at <https://github.com/teanjarv/HLR>.

### References

Anjävär, T. E., Mitchell, J. and Boyle, R. (2024) 'teanjarv/HLR: v0.2.2'. Zenodo. <https://doi.org/10.5281/zenodo.7683808>

Mitchell, J. S., Huckstepp, T., Allen, A., Louis, P. J., Anjävär, T. E., & Hermens, D. F. (2024:Under review). Early adaptive schemas, emotional regulation, and cognitive flexibility in eating disorders: An examination of sub-type specific predictors of eating disorder symptoms using hierarchical linear regression
